# Supplementary material
Source: PubMed Central journal article supplement (PMC8072394)
Supplement: pnas.2016469118.sapp.pdf [file pnas.2016469118.sapp.pdf]

# PNAS

[www.pnas.org](http://www.pnas.org)

## **Supplementary Information for**

Cholestenone functions as an antibiotic against *Helicobacter pylori* by inhibiting biosynthesis of the cell wall component CGL

Junichi Kobayashi, Masatomo Kawakubo, Chifumi Fujii, Nobuhiko Arisaka, Masaki Miyashita, Yoshiko Sato, Hitomi Komura, Hisanori Matoba, and Jun Nakayama

Jun Nakayama  
E-mail: [jnaka@shinshu-u.ac.jp](mailto:jnaka@shinshu-u.ac.jp)

### **This PDF file includes:**

Figures S1 to S3

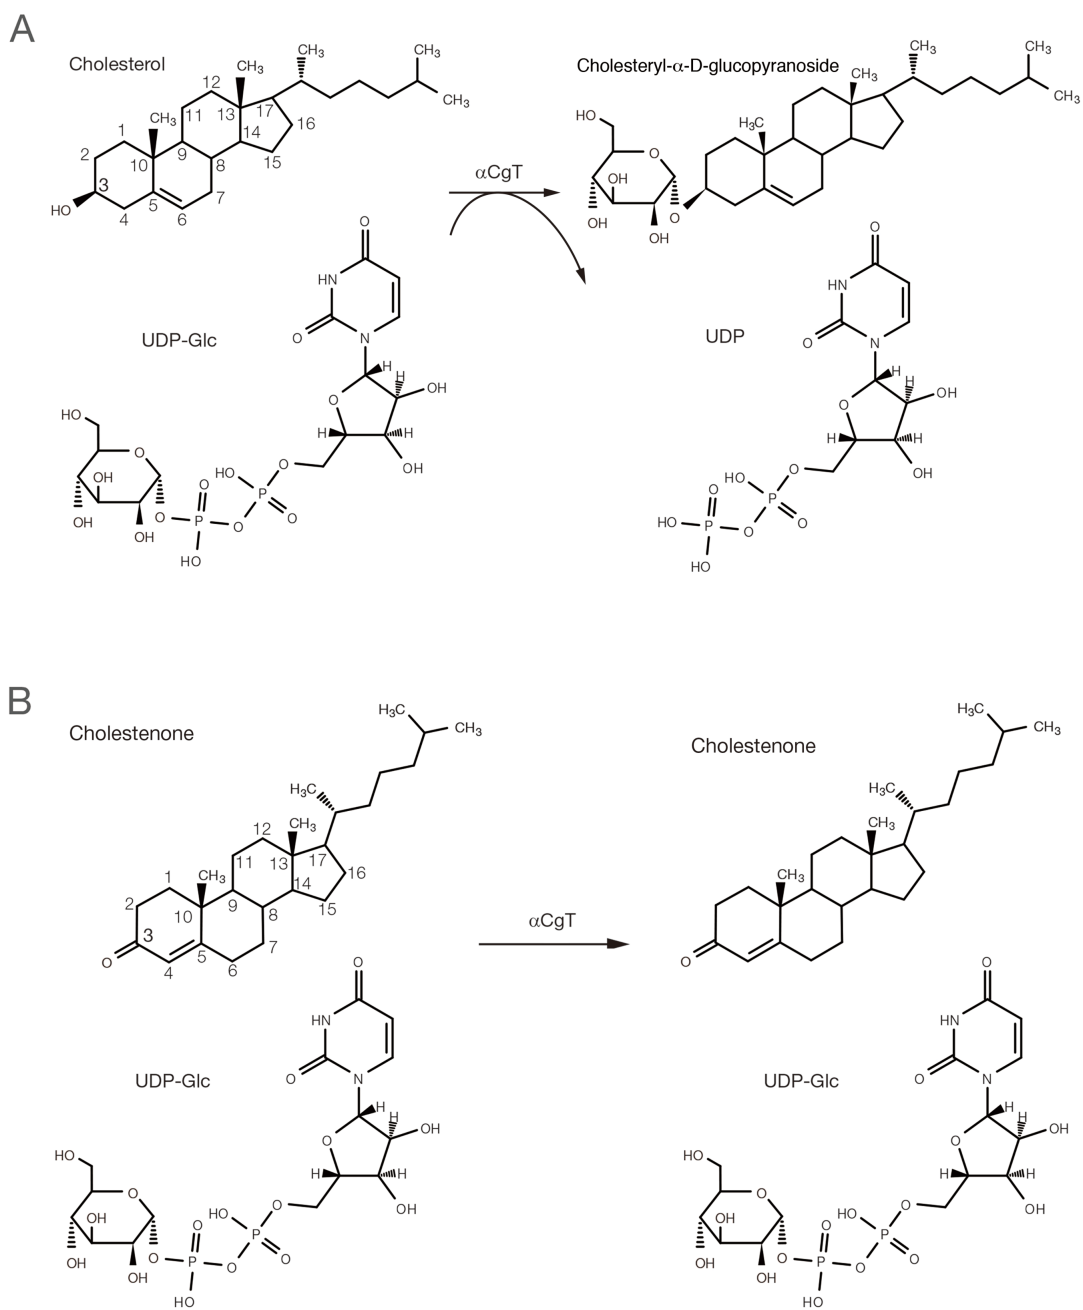

**Fig. S1.** CGL biosynthetic pathway. (A)  $\alpha$ CgT, which transfers glucose (Glc) from UDP-Glc to a hydroxy group at the third position of cholesterol with an  $\alpha$ 1,3-linkage, forms CGL. (B) Because cholestenone has a keto group at the third position of cholesterol,  $\alpha$ CgT cannot form CGL from cholestenone.

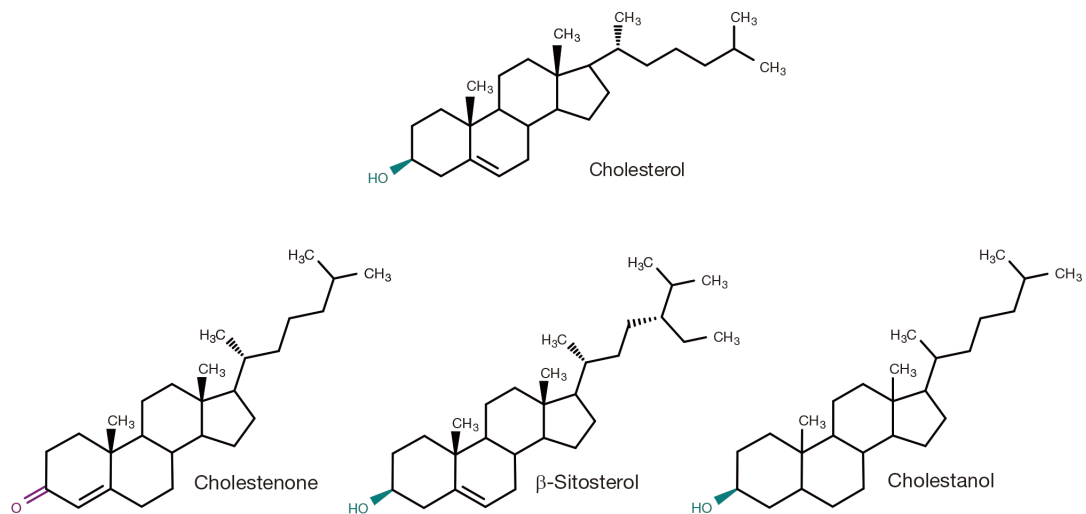

**Fig. S2.** Structures of cholesterol and indicated analogues. Note that the third position of carbon atom of cholestenone is occupied by a keto group (violet), while the same position of the carbon atom of cholesterol,  $\beta$ -sitosterol, and cholestanol is occupied by a hydroxy group (green).

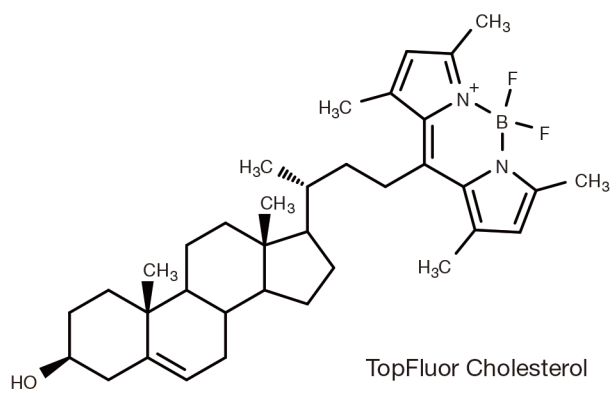

**Fig. S3.** Structure of fluorescently-labeled TopFluor cholesterol.
